# Supplementary material for: Energetic isostructural metal imidazolate frameworks with a bridging dicyanamide linker towards high-performance hypergolic fuels
Source: Royal Society of Chemistry journal article supplement (doi:10.1039/d3qi01080e), 2023-01-01
Supplement: d3qi01080e2.pdf [file d3qi01080e2.pdf]

## Electronic Supplementary Information

### **Energetic isostructural metal imidazolate frameworks with bridging dicyanamide linker towards high-performance hypergolic fuels**

Hong-Yi Bian,<sup>a,c</sup> Yun-Fan Yan,<sup>a,c</sup> Meng Cui,<sup>a,c</sup> Tian-Tian Song,<sup>a</sup> Xiao-Di Guo,<sup>a,c</sup> Jian-Gang Xu,<sup>\*a,b</sup> Fa-Kun Zheng,<sup>\*a,d</sup> and Guo-Cong Guo<sup>a,d</sup>

<sup>a</sup> State Key Laboratory of Structural Chemistry, Fujian Institute of Research on the Structure of Matter, Chinese Academy of Sciences, Fuzhou, Fujian 350002, P. R. China

<sup>b</sup> College of Material Engineering, Fujian Agriculture and Forestry University, Fuzhou, Fujian 350108, P. R. China

<sup>c</sup> College of Chemistry and Materials Science, Fujian Normal University, Fuzhou, Fujian 350007, P. R. China

<sup>d</sup> University of Chinese Academy of Sciences, Beijing 100049, P. R. China

\* Corresponding authors. E-mail addresses: [jgxu@fafu.edu.cn](mailto:jgxu@fafu.edu.cn), [zfk@fjirsm.ac.cn](mailto:zfk@fjirsm.ac.cn)

## **Index:**

|                                      |           |
|--------------------------------------|-----------|
| <b>1. Experimental details</b> ..... | <b>S1</b> |
| <b>2. Tables</b> .....               | <b>S3</b> |
| <b>3. Graphics</b> .....             | <b>S6</b> |
| <b>4. References</b> .....           | <b>S9</b> |

# 1. Experimental details

## 1.1 Heat of combustion.

The constant volume combustion of the compounds was determined by a precision oxygen bomb calorimeter (5E-AC8018, Changsha Kaiyuan Instrument Co., Ltd., China) based on the Linio-Pyfengdelel-Wsava equation.<sup>[1]</sup>

Firstly, we adopted the certified benzoic acid (about 1.0 g, pellet), which has an isothermal heat of combustion of  $(-26434 \pm 3) \text{ J}\cdot\text{g}^{-1}$  at 298.15 K, by the combustion of in an oxygen atmosphere to calibrate the calorimeter. In the second place, 200 mg of the samples was prepared and well mixed with certified benzoic acid (calculated: 800 mg), which was pressed to form a pellet to ensure better combustion. Finally, the pellet was placed in combustion pots, which was subsequently burned in an atmosphere of pure oxygen. The recorded data are the averages of three single measurements.

The constant volume heats of combustion ( $\Delta_c U$ ) were tested by oxygen bomb calorimetry with experimental values of **1** and **2** are  $-27.98$  and  $-25.91 \text{ kJ}\cdot\text{g}^{-1}$ , respectively. The enthalpy of combustion ( $\Delta_c H$ ) was calculated from  $\Delta_c U$  and the gas volume correction:  $\Delta_c H = \Delta_c U + \Delta nRT$ , where  $\Delta n$  is the change of about the number of gas constituents in the reaction process,  $R = 8.314 \text{ J}\cdot\text{mol}^{-1}\cdot\text{K}^{-1}$  and  $T = 298.15 \text{ K}$ . The combustion reactions are given in eqs **1** and **2** as follows:

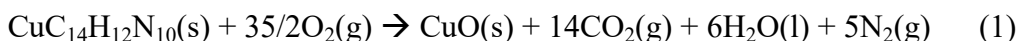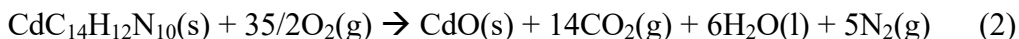

The calculated  $\Delta_c H$  values of **1** and **2** are  $-10735$  and  $-11208 \text{ kJ}\cdot\text{mol}^{-1}$ , respectively. The gravimetric combustion energies densities ( $E_g/\text{kJ}\cdot\text{g}^{-1}$ ) of **1** and **2** are  $27.97$  and  $25.90 \text{ kJ}\cdot\text{g}^{-1}$ , respectively, and the volumetric combustion energy densities ( $E_v/\text{kJ}\cdot\text{cm}^{-3}$ ) of **1** and **2** are  $42.91$  and  $41.98 \text{ kJ}\cdot\text{cm}^{-3}$ , respectively.

## 1.2 Sensitivity Test.

The sensitivities of the compounds were determined according to the BAM (German: Bundesanstalt für Materialforschung und Prüfung) standard for friction and impact. The classification of the tested compounds results from the ‘UN Recommendations on the Transport of Dangerous Goods’.

**Impact sensitivity:** The impact sensitivities of **1** and **2** were tested on a BAM fall hammer produced by OZM Research Impact sensitivity tests according to STANAG 4489. A 10 kg weight was dropped from a set height onto a 10 mg sample placed on a copper cap. The test results showed that the explosion happened with approximate 50% initiation probability. Impact sensitivities of **1** and **2** were observed to be  $> 100$  J, respectively.<sup>[2]</sup>

**Friction sensitivity:** The friction sensitivity was determined using a FSKM-10 BAM friction apparatus produced by OZM Research based on STANAG 4487. Friction sensitivities of **1** and **2** both were observed to be  $>360$  N.

### 1.3 Specific impulse and thrust coefficient.

Specific impulse and thrust coefficient are crucial parameters to access propellant performance. Specific impulse represents the duration of per unit propellant producing the same thrust and thrust coefficient ( $CF$ ) represents the ratio of actual thrust to isentropic expansion flow. It is calculated by equations  $CF = I_{sp} \cdot g \cdot c^{*-1}$ , where  $g = 9.8 \text{ m} \cdot \text{s}^{-2}$ ,  $c^*$  is effective velocity calculated by software. In this work, the theoretical specific impulse was calculated by chemical equilibrium application (CEA) codes and reported by NASA researchers.<sup>[3]</sup> In the entire calculation, the chemical formula of fuels and oxidizer ( $\text{HNO}_3$ ), heat of formation ( $\Delta_f H^o = 339 \text{ kJ} \cdot \text{mol}^{-1}$ ), ambient temperature ( $T_a = 298.15 \text{ K}$ ), fuel-to-oxidizer ratio ( $\text{O/F} = 1.0\text{--}4.0$ ), chamber pressure ( $P_c = 25 \text{ atm}$ ), ambient pressure ( $P_e = 1 \text{ atm}$ ), expansion ratio (exit to-throat area ratio,  $A_e/A_t = 2\text{--}5$ ), freezing flow conditions during expansion were also considered. The best thrust of **1** was collected at  $\text{O/F} = 4.0$ ,  $A_e/A_t = 4.836$  with  $I_{sp} = 208 \text{ s}$  and  $CF = 1.478$ . The best thrust of **2** was collected at  $\text{O/F} = 3.0$ ,  $A_e/A_t = 4.740$  with  $I_{sp} = 283 \text{ s}$  and  $CF = 1.473$ .

## 2. Tables

**Table S1. Crystal data and structure refinement parameters for 1 and 2.**

| Compound                                                         | 1                                                 | 2                                                 |
|------------------------------------------------------------------|---------------------------------------------------|---------------------------------------------------|
| CCDC                                                             | 2217909                                           | 2219269                                           |
| Empirical formula                                                | C <sub>14</sub> H <sub>12</sub> CuN <sub>10</sub> | C <sub>14</sub> H <sub>12</sub> CdN <sub>10</sub> |
| <i>M<sub>r</sub></i> (g mol <sup>-1</sup> )                      | 383.88                                            | 432.74                                            |
| Crystal system                                                   | triclinic                                         | triclinic                                         |
| Space group                                                      | <i>P</i> -1                                       | <i>P</i> -1                                       |
| <i>Z</i>                                                         | 1                                                 | 1                                                 |
| <i>a</i> /Å                                                      | 6.6425(3)                                         | 6.6598(2)                                         |
| <i>b</i> /Å                                                      | 7.4782(4)                                         | 7.6512(3)                                         |
| <i>c</i> /Å                                                      | 8.8833(5)                                         | 9.0619(3)                                         |
| $\alpha$ /°                                                      | 106.162(5)                                        | 104.038(3)                                        |
| $\beta$ /°                                                       | 97.561(4)                                         | 95.331(3)                                         |
| $\gamma$ /°                                                      | 95.007(4)                                         | 94.779(3)                                         |
| <i>V</i> /Å <sup>3</sup>                                         | 416.57(4)                                         | 443.34(3)                                         |
| <i>D<sub>c</sub></i> /g cm <sup>-3</sup>                         | 1.530                                             | 1.621                                             |
| Temperature (K)                                                  | 300.04(10)                                        | 296.72(10)                                        |
| <i>F</i> (000)                                                   | 195.0                                             | 214.0                                             |
| GOF on <i>F</i> <sup>2</sup>                                     | 1.039                                             | 1.030                                             |
| <i>R</i> <sub>1</sub> ( <i>I</i> > 2σ( <i>I</i> )) <sup>a</sup>  | 0.0388                                            | 0.0321                                            |
| <i>wR</i> <sub>2</sub> ( <i>I</i> > 2σ( <i>I</i> )) <sup>b</sup> | 0.0839                                            | 0.0570                                            |
| <i>R</i> <sub>1</sub> (all data) <sup>a</sup>                    | 0.0519                                            | 0.0352                                            |
| <i>wR</i> <sub>2</sub> (all data) <sup>b</sup>                   | 0.0900                                            | 0.0583                                            |

<sup>a</sup>  $R_1 = \sum(F_o - F_c)/\sum F_o$ ; <sup>b</sup>  $wR_2 = [\sum w(F_o^2 - F_c^2)^2/\sum w(F_o^2)^2]^{1/2}$

**Table S2. Selected bond distances (Å) and bond angles (°) for 1 and 2.**

---

| Compound 1          |            |                     |            |
|---------------------|------------|---------------------|------------|
| Cu(1)–N(4)          | 2.002(17)  | Cu(1)–N(4)#1        | 2.002(17)  |
| Cu(1)–N(1)          | 2.004(2)   | Cu(1)–N(1)#1        | 2.004(2)   |
| Cu(1)–N(3)#2        | 2.516(21)  | Cu(1)–N(3)#4        | 2.516(21)  |
|                     |            |                     |            |
| N(4)#1–Cu(1)–N(1)#1 | 89.81(7)   | N(4)#1–Cu(1)–N(3)#4 | 92.71(70)  |
| N(4)#1–Cu(1)–N4     | 180.00     | N(4)#1–Cu(1)–N1     | 90.19(7)   |
| N(4)#1–Cu(1)–N(3)#2 | 87.29(70)  | N(1)#1–Cu(1)–N(3)#4 | 90.12(74)  |
| N(1)#1–Cu(1)–N(4)   | 90.19(7)   | N(1)#1–Cu(1)–N(1)   | 180.00     |
| N(1)#1–Cu(1)–N(3)#2 | 89.88(75)  | N(3)#4–Cu(1)–N(4)   | 87.29(70)  |
| N(3)#2–Cu(1)–N(1)   | 90.23(86)  | N(3)#2–Cu(1)–N(3)#4 | 179.99(65) |
| N(1)–Cu(1)–N(4)     | 90.19(7)   | N(1)–Cu(1)–N(3)#4   | 89.88(75)  |
| N(3)#2–Cu(1)–N4     | 92.71(70)  |                     |            |
|                     |            |                     |            |
| Compound 2          |            |                     |            |
| Cd(1)–N(3)#2        | 2.407(2)   | Cd(1)–N(3)#3        | 2.407(2)   |
| Cd(1)–N(1)          | 2.357(2)   | Cd(1)–N(1)#1        | 2.357(2)   |
| Cd(1)–N(4)#1        | 2.282(19)  | Cd(1)–N(4)          | 2.282(19)  |
|                     |            |                     |            |
| N(4)–Cd(1)–N(4)#1   | 180.00(10) | N(4)–Cd(1)–N(1)#1   | 89.02(8)   |
| N(4)#1–Cd(1)–N(1)#1 | 90.98(8)   | N(4)–Cd(1)–N(1)     | 90.98(8)   |
| N(3)#2–Cd(1)–N(3)#3 | 180.00(9)  | N(4)#1–Cd(1)–N(3)#3 | 87.76(7)   |
| N(1)#1–Cd(1)–N(3)#2 | 90.21(8)   | N(1)#1–Cd(1)–N(1)   | 180.0      |
| N(4)–Cd(1)–N(3)#2   | 87.76(7)   | N(1)#1–Cd(1)–N(3)#3 | 89.79(8)   |
| N(1)–Cd(1)–N(3)#2   | 89.79(8)   | N(4)–Cd(1)–N(3)#3   | 92.24(7)   |
| N(4)#1–Cd(1)–N(3)#2 | 92.24(7)   | N(1)–Cd(1)–N(3)#3   | 90.21(8)   |
| N(4)#1–Cd(1)–N(1)   | 89.02(8)   |                     |            |

---

Symmetry codes for compounds **1** and **2**, For **1**, #1  $2-x, -y, 1-z$ . #2  $2-x, 1-y, 1-z$ . #3  $x, 1+y, z$ . #4  $x, -1+y, z$ . For **2**, #1  $1-x, -y, -z$ . #2  $1-x, 1-y, -z$ . #3  $x, -1+y, z$ .

**Table S3. The values of *ID* time, flame duration and flame height from droplet tests for 5 times (numbers in parentheses represent the order of experiments).**

|                                                | <b>1</b> | <b>2</b> | <b>Cu-MIX</b> | <b>Cd-MIX</b> |
|------------------------------------------------|----------|----------|---------------|---------------|
| <b><i>ID</i>(ms)</b>                           | 28(1)    | 40(1)    | 209(1)        | 328(1)        |
|                                                | 30(2)    | 36(2)    | 186(2)        | 353(2)        |
|                                                | 28(3)    | 37(3)    | 172(3)        | 320(3)        |
|                                                | 32(4)    | 39(4)    | 180(4)        | 316(4)        |
|                                                | 30(5)    | 39(5)    | 174(5)        | 343(5)        |
| <b>Flame duration(ms)</b>                      | 1231(1)  | 693(1)   | 323(1)        | 420(1)        |
|                                                | 1235(2)  | 684(2)   | 295(2)        | 431(2)        |
|                                                | 1269(3)  | 680(3)   | 305(3)        | 442(3)        |
|                                                | 1278(4)  | 666(4)   | 318(4)        | 430(4)        |
|                                                | 1253(5)  | 675(5)   | 317(5)        | 416(5)        |
| <b>Flame hight(cm)</b><br>(approximate values) | 8(1)     | 7(1)     | 8(1)          | 4(1)          |
|                                                | 7(2)     | 7(2)     | 8(2)          | 4(2)          |
|                                                | 8(3)     | 6(3)     | 10(3)         | 6(3)          |
|                                                | 8(4)     | 6(4)     | 10(4)         | 5(4)          |
|                                                | 7(5)     | 6(5)     | 9(5)          | 4(5)          |

### 3. Graphics

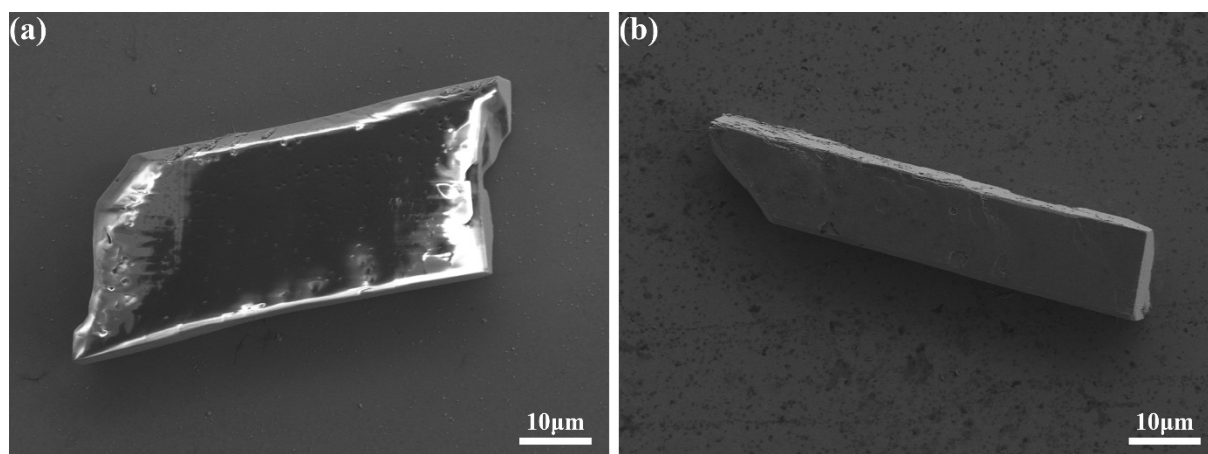

**Fig. S1** (a) The morphology of **1** recorded by FE-SEM. (b) The morphology of **2** recorded by FE-SEM.

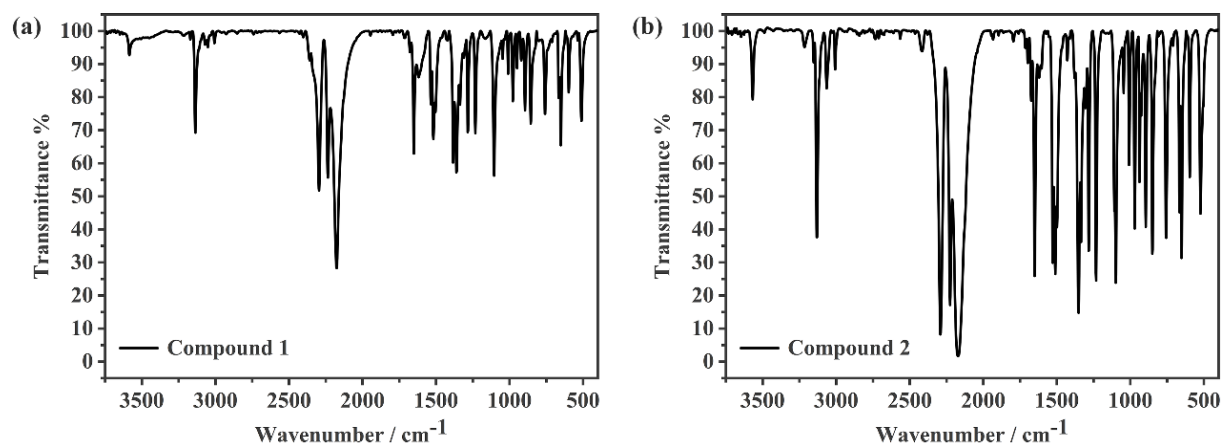

**Fig. S2** The IR spectra of **1** (a) and **2** (b).

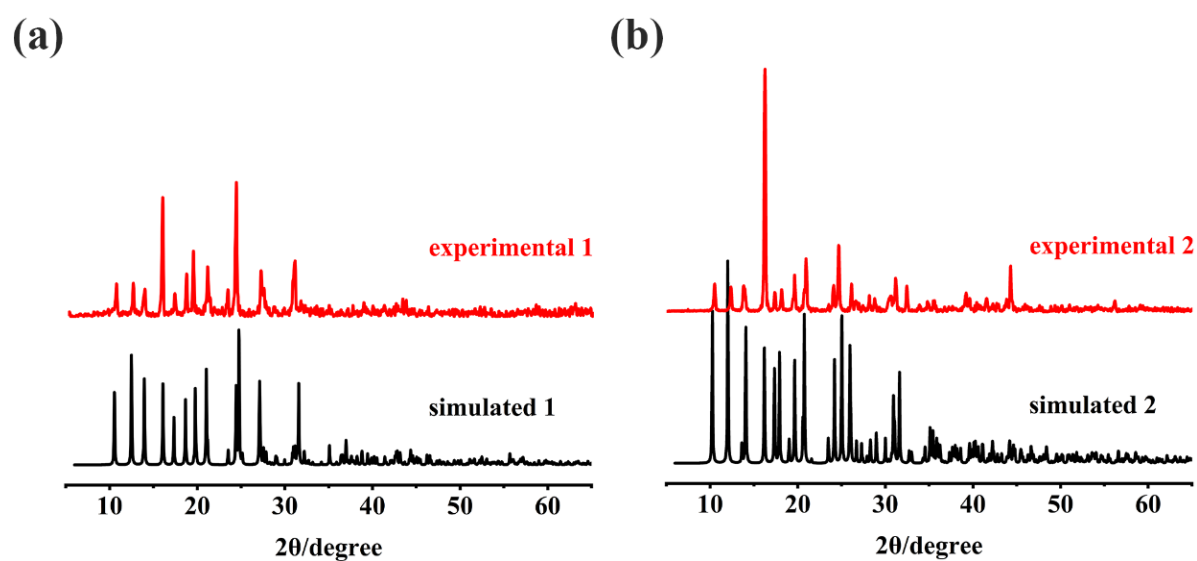

**Fig. S3** Powdered X-ray diffraction (PXRD) patterns of **1** (a) and **2** (b).



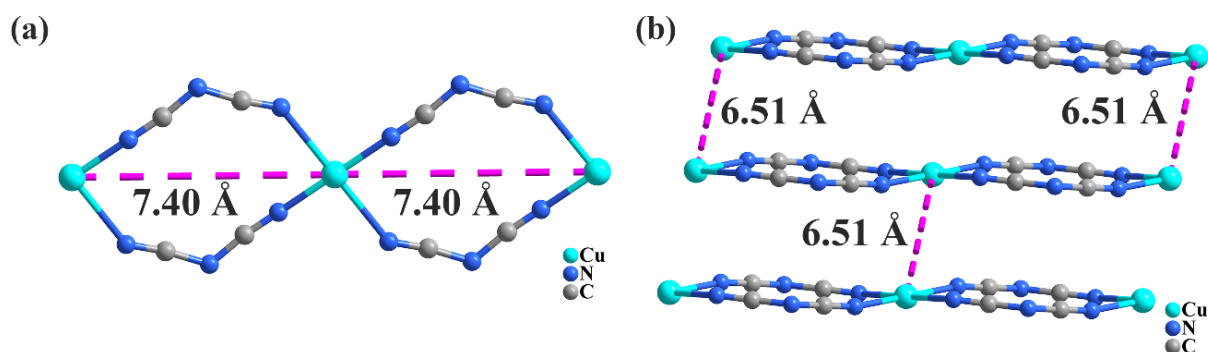

**Fig. S4** The distances of Cu(II) atoms in the 1D chain and between 1D chains of **1** (indicated by the pink dashed line).

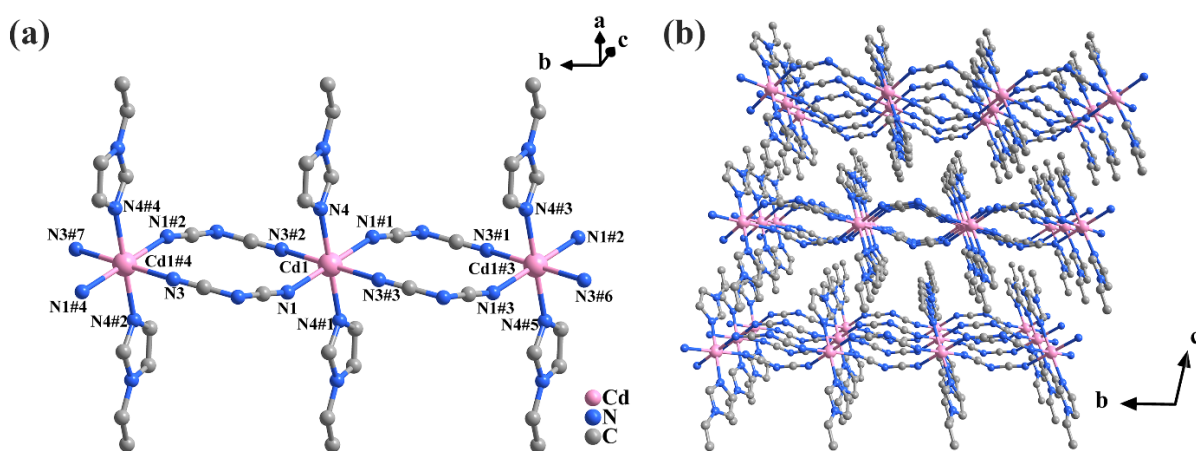

**Fig. S5** The structure of **2**. (a) Coordination environments of one Cd(II) ion, 1-VIM ligands and  $\text{N}(\text{CN})_2^-$ . (b) The 3D supramolecular structures of **2**. Symmetry codes: #1  $1-x, -y, -z$ . #2  $1-x, 1-y, -z$ . #3  $x, -1+y, z$ . #4  $x, 1+y, z$ . #5  $1-x, -1-y, -z$ . #6  $x, -2+y, z$ . #7  $1-x, 2-y, -z$ .

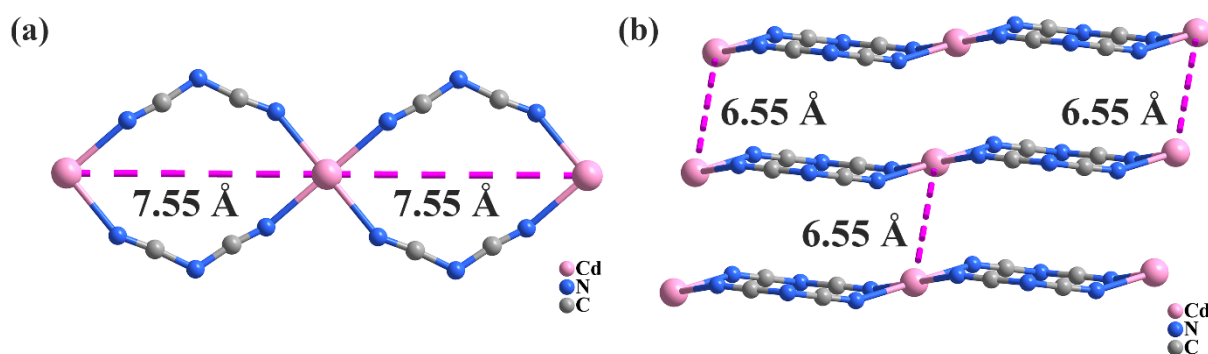

**Fig. S6** The distances of Cd(II) atoms in the 1D chain and between 1D chains of **2** (indicated by the pink dashed line).

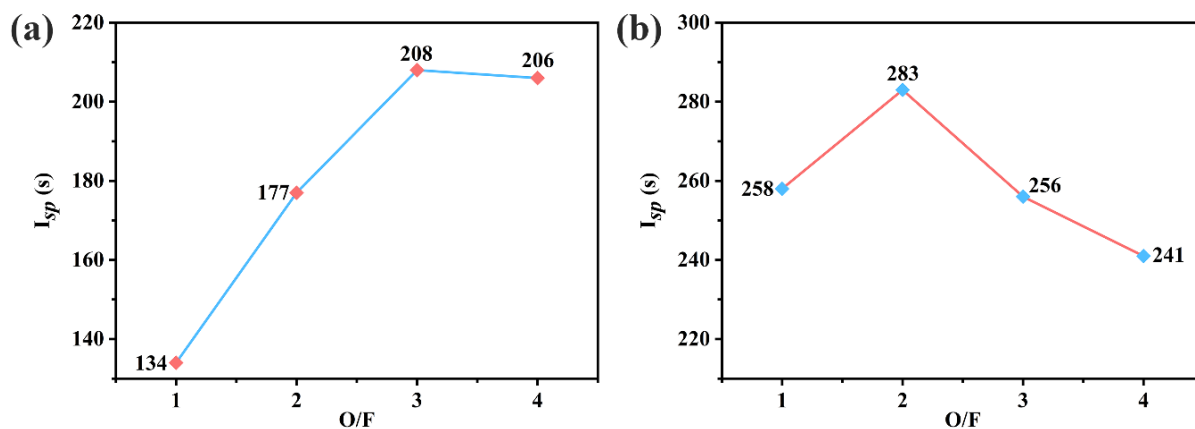

**Fig. S7** Specific impulse curves of WFNA/ECPs 1 (a) and 2 (b).

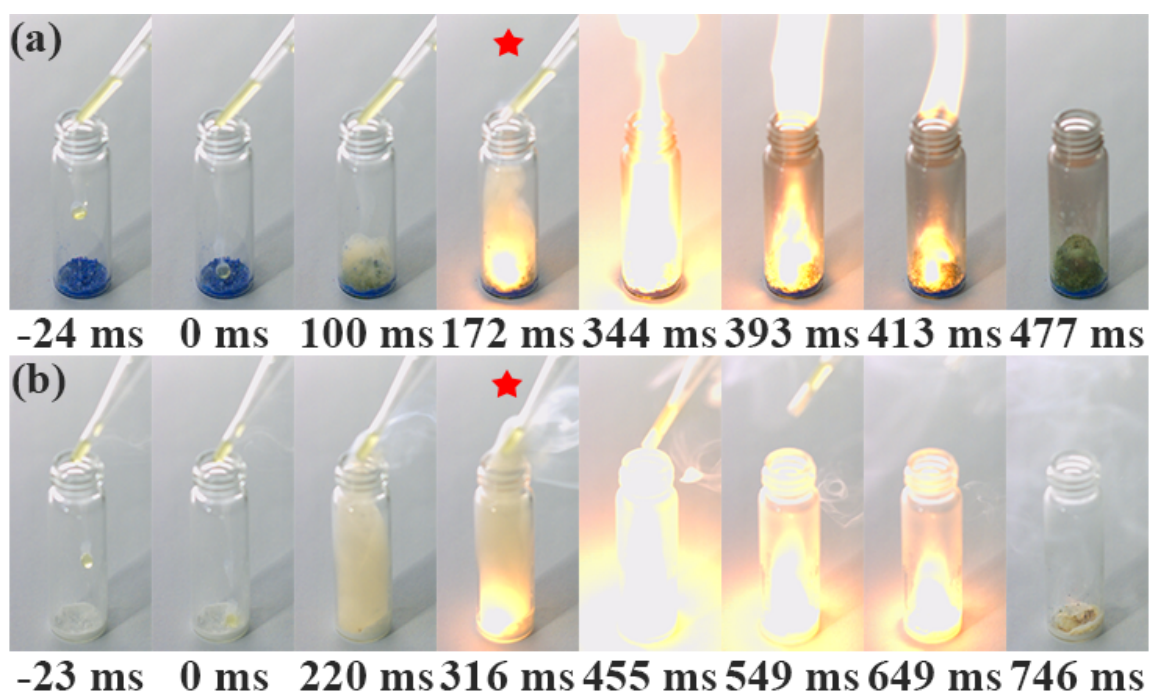

**Fig. S8** High-speed camera captures the moments of physical mixture of  $M(NO_3)_2$ , 1-VIM and NaDCA for ignition delay experiment with WFNA. (a)  $M = Cu$ ; (b)  $M = Cd$ .

## 4. References

[1] M. M. Popov, Thermometry and Calorimetry; Moscow University Publishing House: Moscow. **1954**, 382.

[2] Impact: insensitive  $> 40$  J, less sensitive  $\geq 35$  J, sensitive  $\geq 4$  J, very sensitive  $\leq 3$  J;  
Friction: insensitive  $> 360$  N, less sensitive  $= 360$  N,  $80$  N  $<$  sensitive  $< 360$  N, very sensitive  $\leq 80$  N, extremely sensitive  $\leq 10$  N.

[3] G.S. McBride BJ, Computer Program for Calculation of Complex Chemical Equilibrium Compositions and Applications II. Users Manual and Program Description, NASA Ref. Publ. 1311, NASA Lewis Research Center Cleveland, Ohio 44135; 1996.
